# Supplementary material for: Identification of Tumor Microenvironment-Related Prognostic Genes in Sarcoma
Source: Front Genet. 2021 Feb 1;12:620705. doi: 10.3389/fgene.2021.620705 (PMC7882740; doi:10.3389/fgene.2021.620705)
Supplement: Supplementary Table 1 — The immune scores and stromal scores of 255 patients with SARC. [file Table_1.XLSX]

## Sheet: Table S1 The ESTIMATE results
TCGA ID	StromalScore	ImmuneScore
TCGA.X6.A8C5.01A	1294.14	1076.52
TCGA.3B.A9HT.01A	913.096	2472.06
TCGA.DX.A7ET.01A	1127.81	2400.46
TCGA.X9.A973.01A	1327.32	612.449
TCGA.DX.A48N.01A	885.35	-180.935
TCGA.IE.A4EJ.01A	1458.98	1096.7
TCGA.DX.A6YQ.01A	642.851	1162.65
TCGA.DX.A6Z2.01A	1269.88	1223.73
TCGA.QQ.A5VA.01A	2051.29	2431.51
TCGA.DX.A240.01A	1130.18	-537.918
TCGA.IW.A3M6.01A	1200.46	525.457
TCGA.DX.AB35.01A	1464.09	198.703
TCGA.VT.A80J.01A	1354.19	2167.62
TCGA.SG.A849.01A	1352.83	2427.78
TCGA.3B.A9HZ.01A	940.517	1122.97
TCGA.DX.AB2G.01A	1620.36	1500.4
TCGA.FX.A3NK.01A	1633.31	346.864
TCGA.X6.A8C7.01A	-712.007	-1704.98
TCGA.QQ.A5VC.01A	416.14	-127.401
TCGA.QQ.A5VB.01A	1255.33	1705.97
TCGA.K1.A42X.01A	-225.234	-990.308
TCGA.K1.A3PO.01A	1193.56	1148.62
TCGA.SG.A6Z7.01A	434.346	-940.967
TCGA.QQ.A8VG.01A	1184.11	1772.98
TCGA.DX.A23Z.01A	1827.85	624.693
TCGA.DX.A6BF.01A	1441.19	2215.46
TCGA.DX.A8BV.01A	1722.22	393.199
TCGA.DX.A6YU.01A	1690.53	2113.98
TCGA.DX.A6YX.01A	111.424	341.115
TCGA.MJ.A68J.01A	1873.86	832.952
TCGA.DX.A3LS.01A	1586.49	1367.96
TCGA.WK.A8XZ.01A	474.332	-247.173
TCGA.DX.A1L2.01A	1711.02	846.817
TCGA.DX.A3UE.01A	306.022	-668.623
TCGA.IS.A3K6.01A	-129.622	-155.698
TCGA.3B.A9HJ.01A	1550.4	3115.87
TCGA.MO.A47P.01A	556.61	104.522
TCGA.QC.AA9N.01A	473.202	235.458
TCGA.HB.A43Z.01A	200.498	-702.692
TCGA.DX.A48P.01A	1025.2	530.085
TCGA.DX.A8BS.01A	1085.71	550.943
TCGA.QQ.A5VD.01A	1687.03	1097.47
TCGA.FX.A2QS.01A	1101.1	-65.5076
TCGA.HB.A3L4.01A	-103.754	-815.029
TCGA.MJ.A68H.01A	322.391	-647.394
TCGA.DX.A2J0.01A	1387.51	178.388
TCGA.PT.A8TR.01A	-4.10724	-1424.56
TCGA.DX.A6Z0.01A	1499.73	556.054
TCGA.DX.A3UF.01A	880.186	-4.4983
TCGA.Z4.A9VC.01A	385.044	-195.205
TCGA.DX.AB3B.01A	75.613	-1167.57
TCGA.DX.A8BQ.01A	1296.23	2686.4
TCGA.IE.A3OV.01A	1159.61	943.586
TCGA.DX.A7ES.01A	2053.25	2232.13
TCGA.DX.A2J4.01A	1984.1	1909.86
TCGA.K1.A3PN.01A	0.4119	-449.508
TCGA.JV.A75J.01A	-539.845	-1923.19
TCGA.DX.A23T.01A	1796.55	1906.42
TCGA.DX.AB2Q.01A	1121.58	-187.329
TCGA.VT.AB3D.01A	1581.1	3166.02
TCGA.DX.A8BX.01A	1619.5	1219.5
TCGA.QQ.A5V9.01A	1743.5	1372.37
TCGA.X9.A971.01A	81.7615	-583.107
TCGA.RN.AAAQ.01A	-27.6747	1506.17
TCGA.DX.A8BL.01A	1094.19	1631.09
TCGA.DX.A48O.01A	343.565	-171.27
TCGA.DX.A3LU.01A	1538.04	2430.25
TCGA.DX.A6BA.01A	460.295	-65.8474
TCGA.K1.A6RT.01A	1195.56	2617.11
TCGA.K1.A6RV.01A	982.553	594.241
TCGA.DX.A23R.01A	1130.18	-661.28
TCGA.DX.AB2E.01A	77.9803	738.361
TCGA.HS.A5N9.01A	-745.754	-1338.15
TCGA.IE.A4EI.01A	178.232	-619.504
TCGA.DX.A1L0.01A	1548.46	-271.693
TCGA.3B.A9HI.01A	1698.25	1347.64
TCGA.FX.A76Y.01A	408.586	-399.171
TCGA.IW.A3M4.01A	694.567	-765.826
TCGA.DX.A6BG.01A	1972.31	1542.91
TCGA.3B.A9HU.01A	810.924	1714.23
TCGA.DX.A1L1.01A	1558.22	1969.08
TCGA.N1.A6IA.01A	1121.12	-398.24
TCGA.DX.AB2H.01A	75.2675	-1149.14
TCGA.DX.A48U.01A	289.048	-529.693
TCGA.DX.A2IZ.01A	-768.001	-1495.91
TCGA.SI.A71Q.01A	488.469	-1226.72
TCGA.3B.A9I3.01A	511.218	126.601
TCGA.QQ.A8VB.01A	970.965	-1053.7
TCGA.DX.AB2P.01A	1508.12	575.999
TCGA.PC.A5DO.01A	742.203	281.938
TCGA.HB.A5W3.01A	849.094	10.6437
TCGA.DX.AB32.01A	1606.11	2562.49
TCGA.HB.A2OT.01A	1384.19	1551.94
TCGA.DX.A1L3.01A	1667.63	1281.4
TCGA.DX.A23V.01A	1868.16	1609.19
TCGA.PC.A5DP.01A	251.343	-607.847
TCGA.HS.A5NA.01A	-192.984	-168.237
TCGA.X6.A8C3.01A	1113	1317.1
TCGA.3R.A8YX.01A	336.961	27.3298
TCGA.3B.A9HY.01A	878.333	33.1313
TCGA.DX.AB36.01A	831.317	-327.211
TCGA.MO.A47R.01A	180.33	-285.607
TCGA.K1.A42W.01A	578.704	414.804
TCGA.WP.A9GB.01A	-582.592	-1511.08
TCGA.DX.A8BN.01A	1085.93	750.118
TCGA.DX.A8BM.01A	879.098	340.888
TCGA.KD.A5QU.01A	516.352	-424.886
TCGA.DX.A8BT.01A	1489.69	614.031
TCGA.KD.A5QS.01A	649.967	117.296
TCGA.FX.A3TO.01A	931.213	-400.227
TCGA.DX.AB2L.01A	2246.84	600.162
TCGA.UE.A6QT.01A	1529.65	2716.81
TCGA.DX.AB2X.01A	98.7385	169.147
TCGA.DX.AB2T.01A	1653.1	1784.73
TCGA.3B.A9HO.01A	1738.79	2626.77
TCGA.DX.A7EO.01A	-1238.95	-2024.69
TCGA.DX.A48L.01A	450.109	-808.027
TCGA.X6.A7W8.01A	847.225	1271.51
TCGA.WK.A8XO.01A	1621.61	1427.87
TCGA.WK.A8XT.01A	-781.937	-2088.76
TCGA.DX.A8BH.01A	443.521	1432.52
TCGA.IW.A3M5.01A	198.183	-644.398
TCGA.3B.A9I0.01A	773.08	1197.35
TCGA.DX.A6YV.01A	1051.27	-346.369
TCGA.DX.A6B9.01A	501.291	-272.407
TCGA.DX.A2J1.01A	2075.05	2381.55
TCGA.SI.A71P.01A	901.875	1645.82
TCGA.LI.A9QH.01A	1127.14	-374.409
TCGA.RN.A68Q.01A	512.015	1727.53
TCGA.DX.A7EN.01A	-291.99	-823.538
TCGA.IF.A4AJ.01A	795.568	677.46
TCGA.DX.AB2O.01A	803.391	34.9292
TCGA.X6.A8C2.01A	842.949	628.174
TCGA.MJ.A850.01A	-625.267	-994.449
TCGA.WK.A8XQ.01A	-2.5741	-428.981
TCGA.DX.A8BR.01A	1625.25	1457.87
TCGA.VT.A80G.01A	1518.5	128.321
TCGA.DX.A3UD.01A	28.1515	-70.1945
TCGA.DX.AB3C.01A	-1238.85	-1955.39
TCGA.WK.A8XX.01A	577.945	581.215
TCGA.DX.A8BK.01A	1456.18	1850.44
TCGA.DX.A3U6.01A	2000.43	2923.54
TCGA.MB.A5YA.01A	502.938	297.811
TCGA.DX.A7EQ.01A	-673.069	-923.066
TCGA.DX.A1KY.01A	238.592	-1305.81
TCGA.MB.A5Y8.01A	1017.65	951.957
TCGA.DX.A3U5.01A	1519.23	1227.53
TCGA.SI.AA8C.01A	1217.46	-413.119
TCGA.QQ.A8VF.01A	-115.243	769.343
TCGA.PC.A5DK.01A	780.887	709.81
TCGA.DX.A48R.01A	-610.71	-941.706
TCGA.DX.AB3A.01A	1118.84	-283.338
TCGA.IE.A4EK.01A	207.103	-953.863
TCGA.DX.A6YZ.01A	1244.46	817.481
TCGA.DX.A1L4.01A	2525.17	1871.6
TCGA.QC.A6FX.01A	1115.28	1216.23
TCGA.FX.A48G.01A	615.792	283.509
TCGA.DX.A8BZ.01A	1420.01	1355.58
TCGA.DX.A3UB.01A	998.121	-444.517
TCGA.SI.AA8B.01A	880.153	268.242
TCGA.DX.AB2V.01A	1073.6	640.052
TCGA.MB.A8JK.01A	1299.79	297.817
TCGA.DX.A3M1.01A	1764.22	390.203
TCGA.IE.A4EH.01A	209.633	-578.742
TCGA.DX.A3M2.01A	1785.16	2391.61
TCGA.DX.A6YT.01A	1152.21	211.444
TCGA.DX.A23Y.01A	1867.93	2296
TCGA.DX.A3UC.01A	86.4196	74.9228
TCGA.DX.A8BP.01A	999.685	1932.92
TCGA.3B.A9HX.01A	898.855	666.093
TCGA.DX.A3UA.01A	1035.32	-42.1121
TCGA.DX.A1KW.01A	1383.22	17.4058
TCGA.3B.A9I1.01A	18.0145	-383.447
TCGA.WK.A8XS.01A	261.811	-737.309
TCGA.PC.A5DM.01A	273.829	-10.9073
TCGA.FX.A3RE.01A	1206.25	-384.597
TCGA.DX.A48J.01A	464.429	-410.75
TCGA.SG.A6Z4.01A	1433.09	193.976
TCGA.DX.A7ER.01A	-979.332	-1635.25
TCGA.HB.A3YV.01A	270.586	-714.833
TCGA.QQ.A5V2.01A	781.378	1610.59
TCGA.WK.A8Y0.01A	1141.03	1805.36
TCGA.DX.AB2S.01A	1861.28	3342.35
TCGA.IF.A4AK.01A	423.302	-216.846
TCGA.DX.A6YS.01A	1155.67	-304.525
TCGA.K1.A6RU.01A	1453.36	1126.08
TCGA.Z4.AAPG.01A	543.437	582.686
TCGA.DX.A8BG.01A	1348.59	2797.47
TCGA.3B.A9HP.01A	1238.68	541.518
TCGA.X6.A8C6.01A	1454.63	554.439
TCGA.IF.A3RQ.01A	1140.9	622.015
TCGA.QQ.A8VD.01A	1810.67	-526.062
TCGA.DX.A6BH.01A	1634.18	351.64
TCGA.DX.AB2W.01A	1146.27	1438.47
TCGA.3B.A9HL.01A	1846.13	584.906
TCGA.Z4.A8JB.01A	1979.96	-241.28
TCGA.DX.A1KZ.01A	1880.54	1266.52
TCGA.Z4.AAPF.01A	915.646	-776.87
TCGA.FX.A8OO.01A	-558.693	-1407.98
TCGA.DX.A7EI.01A	328.447	-1263.42
TCGA.IE.A6BZ.01A	1031.61	-153.159
TCGA.DX.A6B7.01A	220.614	-474.764
TCGA.LI.A67I.01A	1270.56	183.193
TCGA.MB.A8JL.01A	847.262	-245.656
TCGA.FX.A3NJ.01A	756.947	-238.263
TCGA.JV.A5VE.01A	548.758	589.116
TCGA.KD.A5QT.01A	-226.134	-754.931
TCGA.DX.A1KX.01A	1622.17	622.729
TCGA.DX.A8BO.01A	1272.54	1739.79
TCGA.DX.A7EL.01A	794.897	1415.97
TCGA.3B.A9HS.01A	1462.53	1450
TCGA.X6.A7WD.01A	776.056	-401.338
TCGA.DX.A7EM.01A	595.37	361.63
TCGA.DX.AB2Z.01A	1007.88	2613.93
TCGA.DX.A3U9.01A	552.654	-751.637
TCGA.IS.A3K7.01A	962.952	964.517
TCGA.DX.A8BU.01A	604.735	-226.663
TCGA.HS.A5N7.01A	873.354	397.995
TCGA.X6.A7WB.01A	-345.148	-945.843
TCGA.WK.A8XY.01A	-112.023	-998.545
TCGA.3B.A9HR.01A	-275.15	-973.544
TCGA.X6.A7WC.01A	1740.42	1403.66
TCGA.KF.A41W.01A	824.234	298.877
TCGA.QC.A7B5.01A	1179.3	898.069
TCGA.DX.A48K.01A	1589.53	417.723
TCGA.3B.A9HV.01A	-535.553	-1079.89
TCGA.DX.A6BE.01A	2278.58	2124.94
TCGA.DX.AATS.01A	1019.55	202.482
TCGA.DX.AB2J.01A	223.05	-1079.64
TCGA.IS.A3KA.01A	-513.44	399.158
TCGA.DX.A3U8.01A	1270.22	2010.47
TCGA.DX.AB30.01A	538.603	-1486.24
TCGA.IS.A3K8.01A	621.954	-660.331
TCGA.DX.A6YR.01A	1380.85	386.703
TCGA.QQ.A8VH.01A	-53.9805	-910.255
TCGA.DX.A1KU.01A	2286.61	953.172
TCGA.HS.A5N8.01A	657.143	174.6
TCGA.DX.A3LW.01A	1638.03	-143.712
TCGA.DX.A6BB.01A	365.486	-663.844
TCGA.3B.A9HQ.01A	637.702	1303.67
TCGA.X6.A8C4.01A	239.71	-104.294
TCGA.DX.A23U.01A	1353.62	134.938
TCGA.DX.A7EU.01A	1389.34	782.854
TCGA.JV.A5VF.01A	537.472	-361.633
TCGA.DX.AB37.01A	1499.08	2310.35
TCGA.DX.A7EF.01A	570.038	-447.681
TCGA.PC.A5DN.01A	1453.13	45.8851
TCGA.SI.A71O.01A	997.903	-79.8977
TCGA.DX.A8BJ.01A	1392.94	90.3428
TCGA.DX.AB2F.01A	1841.65	759.859
TCGA.DX.A3LT.01A	1651.78	1354.58
TCGA.DX.A3U7.01A	471.631	-389.97
TCGA.X2.A95T.01A	496.746	-531.305
TCGA.DX.A6B8.01A	1061.93	-296.308
TCGA.PC.A5DL.01A	499.317	185.539
